# Supplementary material for: Preparation of Highly Porous PAN-LATP Membranes as Separators for Lithium Ion Batteries
Source: MDPI journal article supplement (doi:10.3390/nano9111581), 2019-11-07
Supplement: s1 [file s1]

## Supplementary Information

# Preparation of Highly Porous PAN-LATP Membranes as Separators for Lithium Ion Batteries

Jagdeep Mohanta <sup>1</sup>, O Hyeon Kwon <sup>2</sup>, Jong Hyeok Choi <sup>1</sup>, Yeo-Myeong Yun <sup>3</sup>,  
Jae-Kwang Kim <sup>2,\*</sup> and Sang Mun Jeong <sup>1,\*</sup>

- <sup>1</sup> Department of Chemical Engineering, Chungbuk National University, 1 Chungdae-ro, Seowon-gu, Cheongju, Chungbuk 28644, Korea; jagdeepmohanta@gmail.com (J.M.); qweaq1@naver.com (J.H.C.)
  - <sup>2</sup> Department of Solar & Energy Engineering, Cheongju University, Cheongju, Chungbuk 28503, Korea; ohhyeon2940@naver.com
  - <sup>3</sup> Department of Environmental Engineering, Chungbuk National University, 1 Chungdae-ro, Seowon-gu, Cheongju, Chungbuk 28644, Korea; ymyun@cbnu.ac.kr
- \* Correspondence: jaekwang@cju.ac.kr (J.-K.K.); smjeong@chungbuk.ac.kr (S.M.J.)

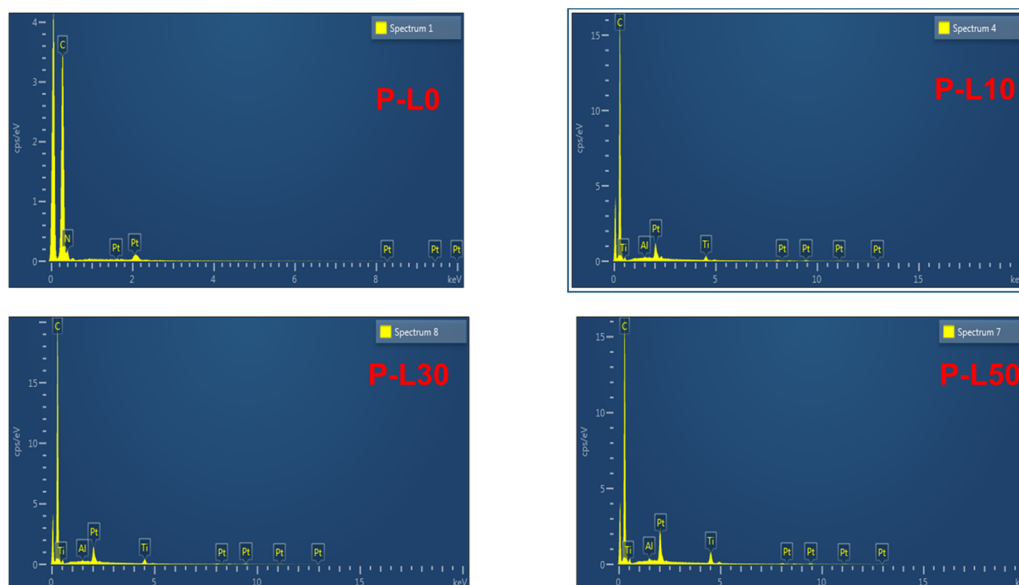

Figure S1. EDS of PL membranes

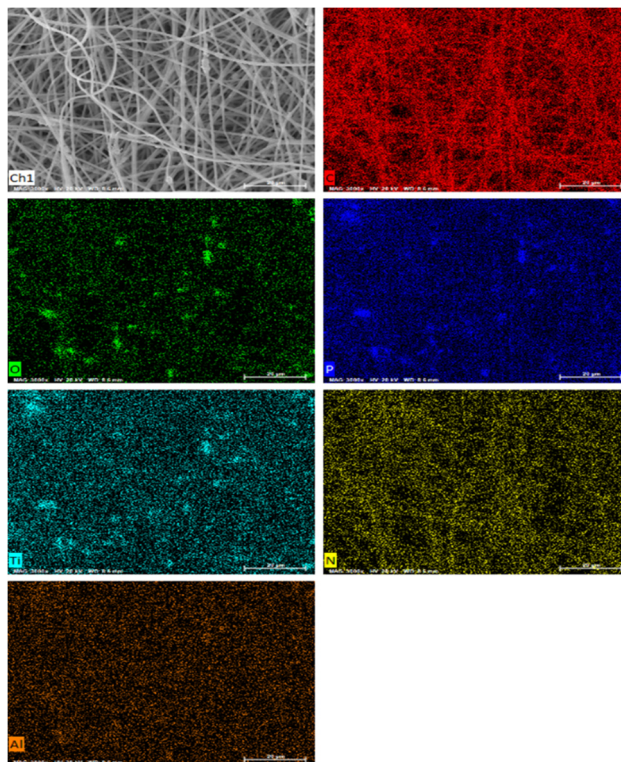

Figure S2. Elemental Mapping of P-L30

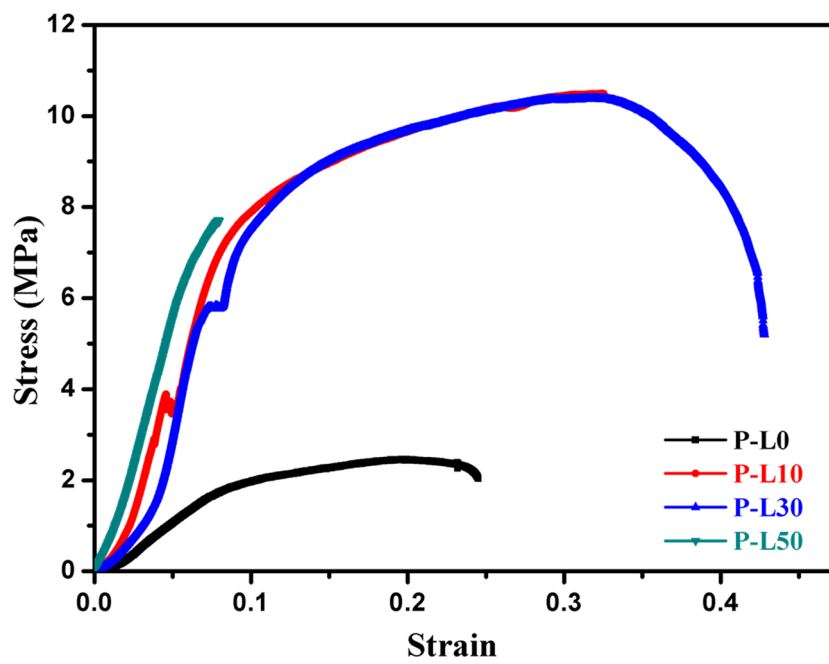

Figure S3. Stress-Strain curves of PL membranes

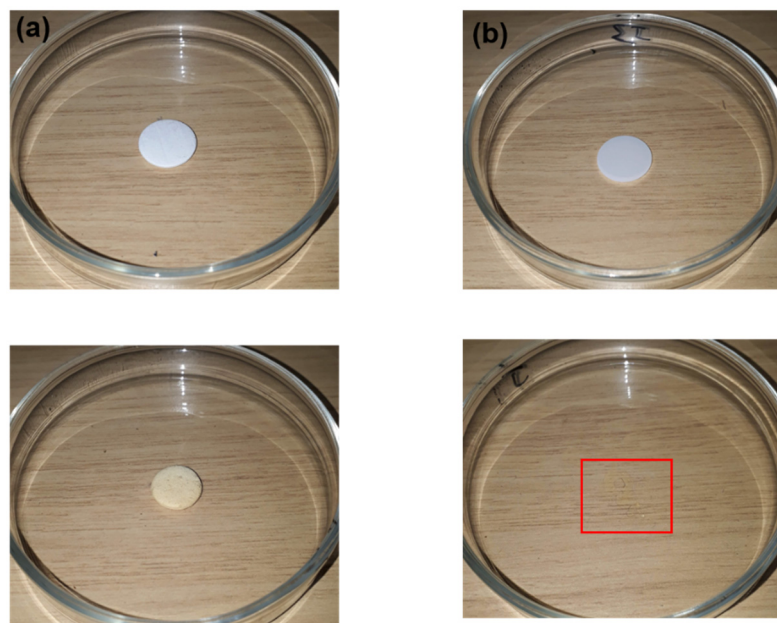

**Figure S4.** Heat treatment at 170 °C of (a) P-L30 (b) celgard separator (Above – Before Heat treatment; Below – After Heat treatment)

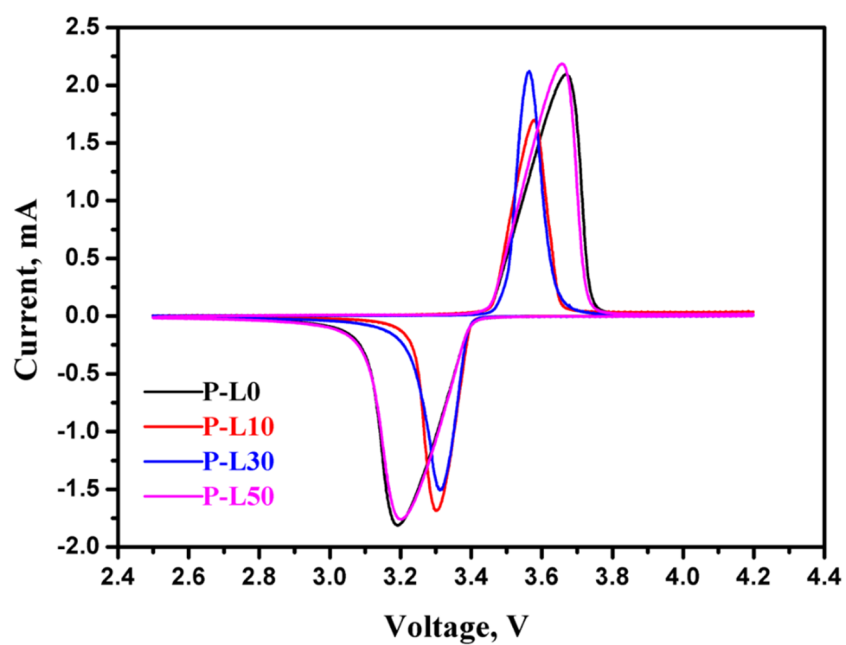

**Figure S5.** Cyclic Voltammetry of PL membranes

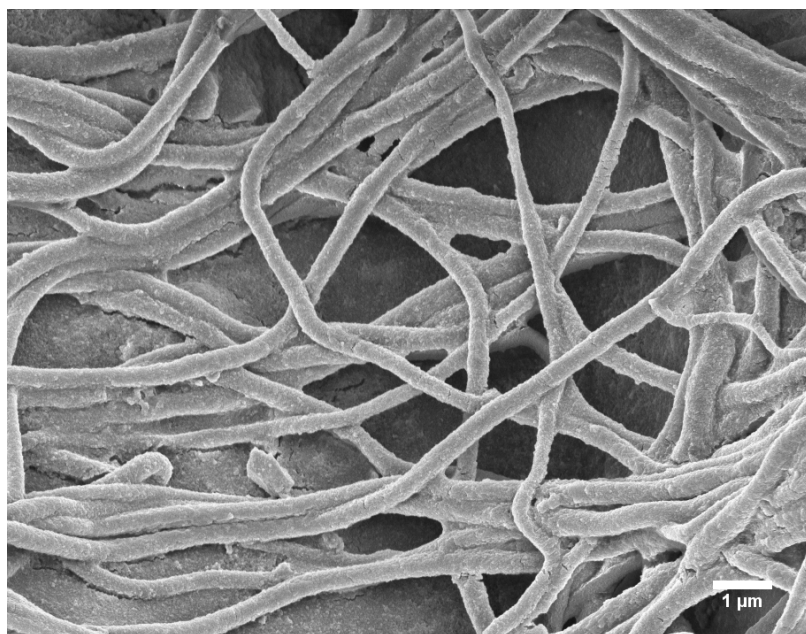

**Figure S6.** FESEM image of P-L30 membrane after 200 cycles of Charge and discharge
